# Supplementary material
Source: publisher site journal article supplement (https://www.oncotarget.com/article/28509)
Supplement: Supplementary file 1 [file 28509]

## Addendum

**Addendum: Influence of nutrition on stage-stratified survival in gastric cancer patients with postoperative complications****Noriyuki Hirahara<sup>1</sup>, Takeshi Matsubara<sup>1</sup>, Shunsuke Kaji<sup>2</sup>, Yuki Uchida<sup>1</sup>, Ryoji Hyakudomi<sup>1</sup>, Tetsu Yamamoto<sup>1</sup>, Kiyoe Takai<sup>1</sup>, Yohei Sasaki<sup>3</sup>, Koki Kawakami<sup>2</sup> and Yoshitsugu Tajima<sup>1</sup>**<sup>1</sup>Department of Digestive and General Surgery, Shimane University Faculty of Medicine, Izumo, Shimane, Japan<sup>2</sup>Department of Surgery, Matsue Red Cross Hospital, Shimane, Matsue, Horomachi, Japan<sup>3</sup>Department of Surgery, Masuda Red Cross Hospital, Shimane, Masuda, Otoyoshi-cho, Japan**Published:****Copyright:** © 2023 Hirahara et al. This is an open access article distributed under the terms of the [Creative Commons Attribution License](#) (CC BY 4.0), which permits unrestricted use, distribution, and reproduction in any medium, provided the original author and source are credited.**This article has an addendum:** No funding was used for this publication.Original article: Oncotarget. 2022; 13:183–197. <https://doi.org/10.18632/oncotarget.28179>
